# Supplementary material for: The impact of race and ethnicity on outcomes in 19,584 adults hospitalized with COVID-19
Source: PubMed Central journal article supplement (PMC8294547; doi:10.1371/journal.pone.0254809), 2021-07-21
Supplement: pone.0254809.s004.pdf [file pone.0254809.s004.pdf]

| COVID-19 Clinical Diagnosis |        |                                                                           |
|-----------------------------|--------|---------------------------------------------------------------------------|
| ICD-10-CM                   | A41.89 | Other specified sepsis                                                    |
| ICD-10-CM                   | B34.2  | Coronavirus infection, unspecified                                        |
| ICD-10-CM                   | B97.21 | SARS-associated coronavirus as the cause of diseases classified elsewhere |
| ICD-10-CM                   | B97.29 | Other coronavirus as the cause of diseases classified elsewhere           |
| ICD-10-CM                   | J12.81 | Pneumonia due to SARS-associated coronavirus                              |
| ICD-10-CM                   | J12.89 | Other viral pneumonia                                                     |
| ICD-10-CM                   | U07.1  | COVID-19, virus identified                                                |
| ICD-10-WHO                  | U07.2  | COVID-19, virus not identified                                            |
