# Supplementary material for: The impact of race and ethnicity on outcomes in 19,584 adults hospitalized with COVID-19
Source: PubMed Central journal article supplement (PMC8294547; doi:10.1371/journal.pone.0254809), 2021-07-21
Supplement: pone.0254809.s005.pdf [file pone.0254809.s005.pdf]

|                                  | <b>Known<br/>Status</b> | <b>Transferred</b> | <b>Status<br/>Unknown</b> | <b>Total</b> |
|----------------------------------|-------------------------|--------------------|---------------------------|--------------|
| <b>American Indian or Alaska</b> | 474<br>80.6%            | 94<br>16.0%        | 20<br>3.4%                | 588          |
| <b>Asian or Pacific islander</b> | 679<br>78.2%            | 142<br>16.4%       | 47<br>5.4%                | 868          |
| <b>Black or African American</b> | 4215<br>71.1%           | 1020<br>17.2%      | 696<br>11.7%              | 5931         |
| <b>White</b>                     | 9994<br>74.3%           | 2789<br>20.7%      | 662<br>4.9%               | 13445        |
| <b>Total</b>                     | 15362                   | 4045               | 1425                      | 20832        |
