# Supplementary material for: The impact of race and ethnicity on outcomes in 19,584 adults hospitalized with COVID-19
Source: PubMed Central journal article supplement (PMC8294547; doi:10.1371/journal.pone.0254809), 2021-07-21
Supplement: pone.0254809.s006.pdf [file pone.0254809.s006.pdf]

|                                      |                                  | Model 1 Excluding<br>Comorbidities and BMI*<br>(n=19,537) |             | Model 2 Including<br>Comorbidities and BMI**<br>(n=11,045) |              |
|--------------------------------------|----------------------------------|-----------------------------------------------------------|-------------|------------------------------------------------------------|--------------|
|                                      |                                  | OR                                                        | 95% CI      | OR                                                         | 95% CI       |
| Sex                                  | Male vs Female                   | 1.53                                                      | (1.41-1.66) | 1.46                                                       | (1.31-1.62)  |
| Race<br>(Ref:White)                  | American Indian or Alaska Native | 1.64                                                      | (1.21-2.23) | 1.21                                                       | (0.80-1.83)  |
|                                      | Asian or Pacific Islander        | 0.78                                                      | (0.63-0.98) | 0.78                                                       | (0.57-1.08)  |
|                                      | Black or African American        | 1.13                                                      | (1.01-1.27) | 1.07                                                       | (0.93-1.23)  |
|                                      | Mixed racial group               | 0.7                                                       | (0.07-8.07) | 1.99                                                       | (0.14-27.94) |
|                                      | Other racial group               | 0.96                                                      | (0.83-1.11) | 1.03                                                       | (0.84-1.27)  |
|                                      | Unknown racial group             | 1.7                                                       | (1.39-2.01) | 1.58                                                       | (1.20-2.07)  |
| Ethnicity<br>(Ref: non-<br>Hispanic) | Ethnic group unknown             | 1.00                                                      | (0.87-1.16) | 1.04                                                       | (0.83-1.29)  |
|                                      | Hispanic or Latino               | 0.74                                                      | (0.65-0.83) | 0.71                                                       | (0.59-0.86)  |
| Comorbidities                        | Asthma                           |                                                           |             | 0.73                                                       | (0.60-0.88)  |
|                                      | Diabetes                         |                                                           |             | 1.27                                                       | (1.13-1.42)  |
|                                      | Heart failure                    |                                                           |             | 1.29                                                       | (1.13-1.47)  |
|                                      | CKD                              |                                                           |             | 1.50                                                       | (1.32-1.69)  |

\*Both models include adjustment for age, ZIP code, and admission date

\*\*Comorbidity and BMI model includes adjustment factors in model 1 as well as for BMI, modeled as nonlinear using restricted cubic spline
